# Supplementary material for: One-pot synthesis of high-capacity silicon-lithium anodes via on-copper growth of a semi-conducting, porous polymer
Source: Research Square preprint supplement (doi:10.21203/rs.3.rs-366917/v1), 2021-04-06
Supplement: Supplementary file 2 [file dcc9a955d57f739c5b6b07ca.xlsx]

## Sheet: Tabelle1
Samples	Thickness (μm)	Mass loading (mg)	electrode radius (cm)	Electrode Volume (cm3)	Electrode density (g cm-3)
N Edge1	21.01	1.49	0.9	0.00534639	0.278693
N Edge1	21.02	1.49	0.9	0.00534893	0.27856
N Edge1	20.59	1.49	0.9	0.00523951	0.284378
N Edge1	20.42	1.49	0.9	0.00519625	0.286745
N Edge1	20.39	1.49	0.9	0.00518862	0.287167
N Edge1	20.43	1.49	0.9	0.0051988	0.286605
N Edge1	20.03	1.49	0.9	0.00509701	0.292328
N Edge1	20.32	1.49	0.9	0.00517081	0.288156
N Edge1	19.96	1.49	0.9	0.0050792	0.293353
N Edge1	20.28	1.49	0.9	0.00516063	0.288725
N Center	22.56	1.49	0.9	0.00574082	0.259545
N Center	22.08	1.49	0.9	0.00561867	0.265187
N Center	21.92	1.49	0.9	0.00557796	0.267123
N Center	21.6	1.49	0.9	0.00549653	0.27108
N Center	21.52	1.49	0.9	0.00547617	0.272088
N Center	21.39	1.49	0.9	0.00544309	0.273742
N Center	21.1	1.49	0.9	0.00536929	0.277504
N Center	21.06	1.49	0.9	0.00535911	0.278031
N Center	21.06	1.49	0.9	0.00535911	0.278031
N Center	21.12	1.49	0.9	0.00537438	0.277241
N Edge2	23.27	1.49	0.9	0.00592149	0.251626
N Edge2	23.39	1.49	0.9	0.00595202	0.250335
N Edge2	23.47	1.49	0.9	0.00597238	0.249482
N Edge2	23.5	1.49	0.9	0.00598002	0.249163
N Edge2	23.51	1.49	0.9	0.00598256	0.249057
N Edge2	23.34	1.49	0.9	0.0059393	0.250871
N Edge2	23.46	1.49	0.9	0.00596984	0.249588
N Edge2	23.43	1.49	0.9	0.0059622	0.249908
N Edge2	23.34	1.49	0.9	0.0059393	0.250871
N Edge2	23.29	1.49	0.9	0.00592658	0.25141
T Edge1	21.24	1.43	0.9	0.00540492	0.264574
T Edge1	21.17	1.43	0.9	0.0053871	0.265449
T Edge1	21.07	1.43	0.9	0.00536166	0.266709
T Edge1	20.95	1.43	0.9	0.00533112	0.268236
T Edge1	20.95	1.43	0.9	0.00533112	0.268236
T Edge1	20.92	1.43	0.9	0.00532349	0.268621
T Edge1	20.87	1.43	0.9	0.00531076	0.269264
T Edge1	20.69	1.43	0.9	0.00526496	0.271607
T Edge1	20.74	1.43	0.9	0.00527768	0.270952
T Edge1	20.79	1.43	0.9	0.00529041	0.270301
T Center	22.06	1.43	0.9	0.00561358	0.254739
T Center	21.71	1.43	0.9	0.00552452	0.258846
T Center	21.63	1.43	0.9	0.00550416	0.259803
T Center	21.55	1.43	0.9	0.0054838	0.260768
T Center	21.54	1.43	0.9	0.00548126	0.260889
T Center	21.54	1.43	0.9	0.00548126	0.260889
T Center	21.49	1.43	0.9	0.00546853	0.261496
T Center	21.05	1.43	0.9	0.00535657	0.266962
T Center	21.4	1.43	0.9	0.00544563	0.262596
T Center	21.44	1.43	0.9	0.00545581	0.262106
T Edge2	24.6	1.43	0.9	0.00625993	0.228437
T Edge2	24.41	1.43	0.9	0.00621158	0.230215
T Edge2	24.29	1.43	0.9	0.00618105	0.231352
T Edge2	24.15	1.43	0.9	0.00614542	0.232694
T Edge2	24.07	1.43	0.9	0.00612506	0.233467
T Edge2	24.03	1.43	0.9	0.00611489	0.233856
T Edge2	24	1.43	0.9	0.00610725	0.234148
T Edge2	24	1.43	0.9	0.00610725	0.234148
T Edge2	24.01	1.43	0.9	0.0061098	0.23405
T Edge2	23.97	1.43	0.9	0.00609962	0.234441
D Edge1	23.1	1.53	0.9	0.00587823	0.260282
D Edge1	23.01	1.53	0.9	0.00585533	0.261301
D Edge1	22.79	1.53	0.9	0.00579934	0.263823
D Edge1	22.47	1.53	0.9	0.00571791	0.26758
D Edge1	22.63	1.53	0.9	0.00575863	0.265688
D Edge1	22.66	1.53	0.9	0.00576626	0.265337
D Edge1	22.26	1.53	0.9	0.00566448	0.270104
D Edge1	22.41	1.53	0.9	0.00570265	0.268297
D Edge1	22.61	1.53	0.9	0.00575354	0.265923
D Edge1	22.64	1.53	0.9	0.00576117	0.265571
D Center	23.13	1.53	0.9	0.00588586	0.259945
D Center	23.19	1.53	0.9	0.00590113	0.259272
D Center	22.59	1.53	0.9	0.00574845	0.266159
D Center	22.43	1.53	0.9	0.00570773	0.268057
D Center	22.48	1.53	0.9	0.00572046	0.267461
D Center	22.56	1.53	0.9	0.00574082	0.266513
D Center	22.53	1.53	0.9	0.00573318	0.266868
D Center	22.41	1.53	0.9	0.00570265	0.268297
D Center	22.38	1.53	0.9	0.00569501	0.268656
D Center	21.86	1.53	0.9	0.00556269	0.275047
D Edge2	25.04	1.53	0.9	0.0063719	0.240117
D Edge2	24.73	1.53	0.9	0.00629301	0.243127
D Edge2	24.47	1.53	0.9	0.00622685	0.24571
D Edge2	24.42	1.53	0.9	0.00621413	0.246213
D Edge2	24.41	1.53	0.9	0.00621158	0.246314
D Edge2	24.24	1.53	0.9	0.00616832	0.248041
D Edge2	24.16	1.53	0.9	0.00614797	0.248863
D Edge2	24.13	1.53	0.9	0.00614033	0.249172
D Edge2	24.01	1.53	0.9	0.0061098	0.250418
D Edge2	24.05	1.53	0.9	0.00611997	0.250001
				Electrode density everage (g cm-3)	0.261051
				Electrode density standard deviation (g cm-3)	0.0152938
